Development 136, 1583 (2009) doi:10.1242/dev.037002

## The sea urchin animal pole domain is a Six3-dependent neurogenic patterning center Zheng Wei, Junko Yaguchi, Shunsuke Yaguchi, Robert C. Angerer and Lynne M. Angerer

There was an error published in *Development* **136**, 1179-1189.

On page 1181, it was incorrectly stated that ‘We confirmed previous studies showing that *Six3* is expressed in a dynamic pattern during development of *Paracentrotus lividus* (Poustka et al., 2007), a species closely related to *Strongylocentrotus purpuratus* used in this study.’

It should have stated ‘We confirmed previous studies showing that *Six3* is expressed in a dynamic pattern during development of *Strongylocentrotus purpuratus* (Poustka et al., 2007).’

The authors apologise to readers for this mistake.
